# Supplementary material for: A proposal fit for a “King”: Evaluating the replacement of section 106 of the NRHP with NEPA
Source: Royal Society of Chemistry journal article supplement (doi:10.1039/d0nr00607f), 2013-01-15
Supplement: d0nr00607f1.pdf [file d0nr00607f1.pdf]

## Electronic Supplementary Information

### Oxygen Vacancies-Rich Amorphous Porous NiFe(OH)<sub>x</sub> Derived from Ni(OH)<sub>x</sub>/Prussian Blue as Highly Efficient Oxygen Evolution Electrocatalysts

Shuang Wang,<sup>a</sup> Xingbo Ge,<sup>\*a</sup> Chao Lv,<sup>b</sup> Cun Hu,<sup>b</sup> Hongtai Guan,<sup>a</sup> Jing Wu,<sup>a</sup> Zhengnan Wang,<sup>a</sup> Xianhui Yang,<sup>a</sup> Yan Shi,<sup>b</sup> Jiangfeng Song,<sup>b</sup> Zhi Zhang,<sup>b</sup> Akira Watanabe<sup>c</sup> and Jinguang Cai<sup>\*b</sup>

<sup>a</sup> School of Chemistry and Chemical Engineering, Southwest Petroleum University,  
Chengdu 610500, P. R. China

<sup>b</sup> Institute of Materials, China Academy of Engineering Physics, Jianguyou, 621908,  
Sichuan, P. R. China

<sup>c</sup> Institute of Multidisciplinary Research for Advanced Materials, Tohoku University,  
2-1-1 Katahira, Aoba-ku, Sendai, 980-8577, Japan

\*Corresponding authors: [xbge@swpu.edu.cn](mailto:xbge@swpu.edu.cn); [caijinguang@foxmail.com](mailto:caijinguang@foxmail.com)

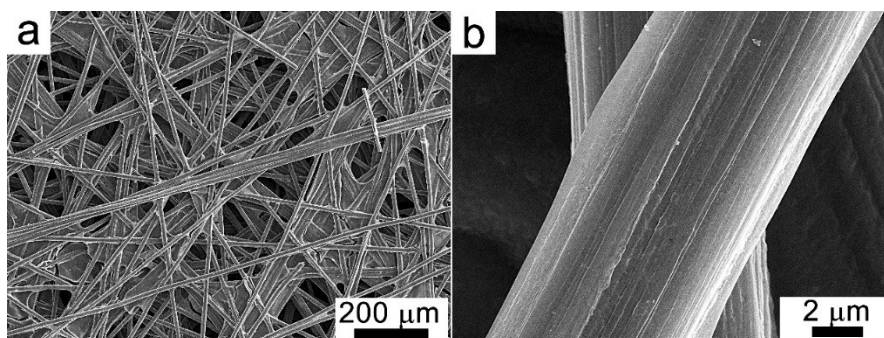

**Fig. S1.** SEM images (a, b) of a bare CP film.

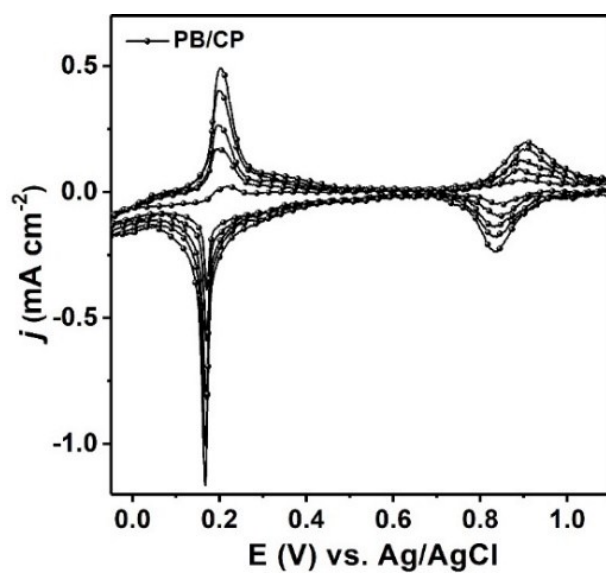

**Fig. S2.** CV curves for the electrodeposition of the PB layer on CP.

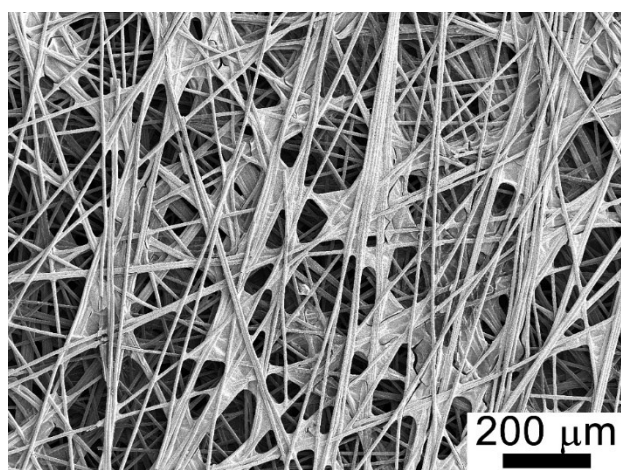

**Fig. S3.** Low-magnification SEM image of the PB/CP.

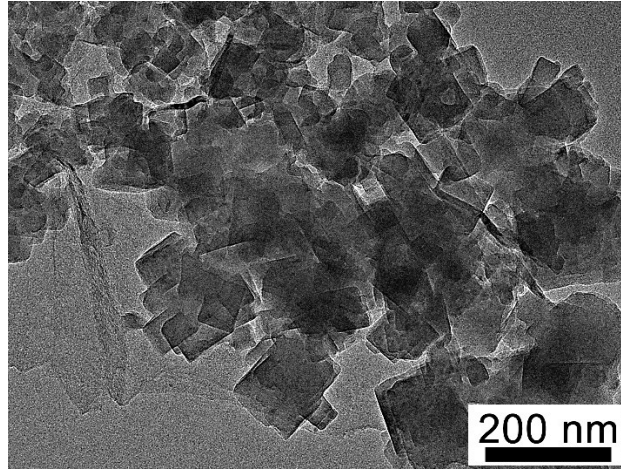

**Fig. S4.** TEM image of the PB nanoparticles peeling off from the carbon paper under strong ultrasonic.

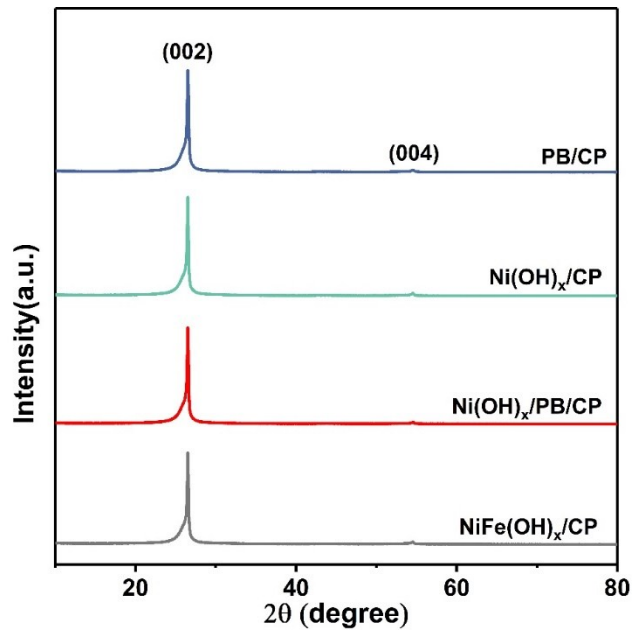

**Fig. S5.** XRD patterns of the PB/CP, Ni(OH)<sub>x</sub> /CP, Ni(OH)<sub>x</sub>/PB/CP, and NiFe(OH)<sub>x</sub>/CP.

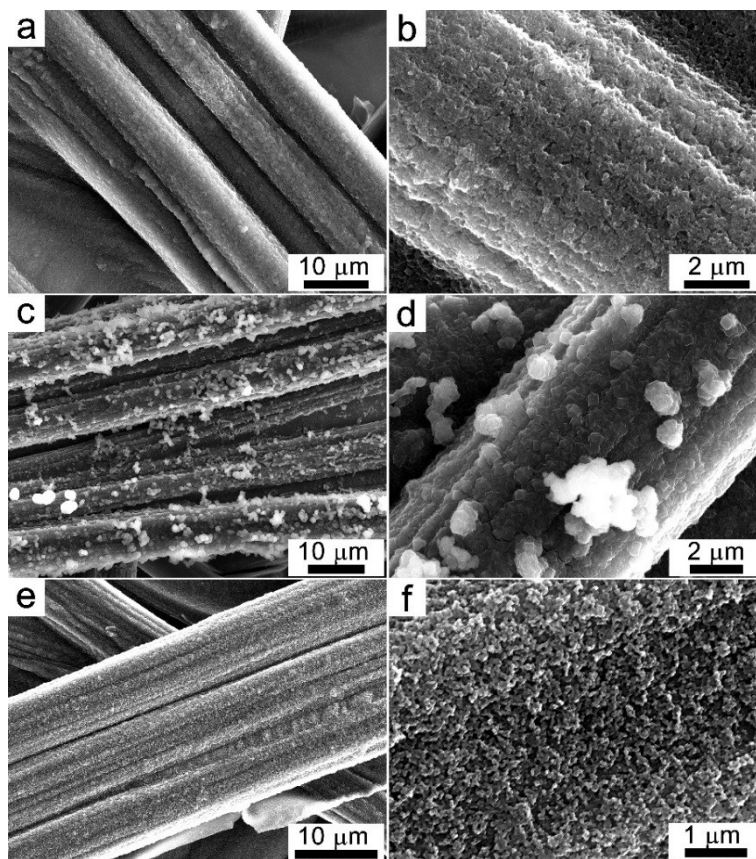

**Fig. S6.** SEM images of PB/CP samples obtained at different Fe(NO<sub>3</sub>)<sub>3</sub> and K<sub>3</sub>[Fe(CN)<sub>6</sub>] concentrations: 0.5 mM Fe(NO<sub>3</sub>)<sub>3</sub> and 1 mM K<sub>3</sub>[Fe(CN)<sub>6</sub>] (a, b), 1 mM Fe(NO<sub>3</sub>)<sub>3</sub> and 0.5 mM K<sub>3</sub>[Fe(CN)<sub>6</sub>] (c, d), and 2 mM Fe(NO<sub>3</sub>)<sub>3</sub> and 0.5 mM K<sub>3</sub>[Fe(CN)<sub>6</sub>] (e, f).

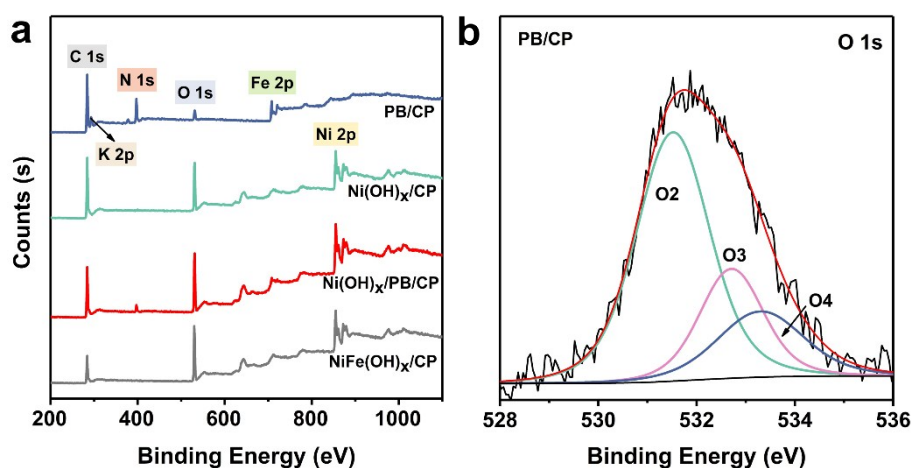

**Fig. S7.** Full XPS spectra of the PB/CP, Ni(OH)<sub>x</sub>/CP, Ni(OH)<sub>x</sub>/PB/CP, and NiFe(OH)<sub>x</sub>/CP (a) and high resolution O1s peak of the PB/CP (b).

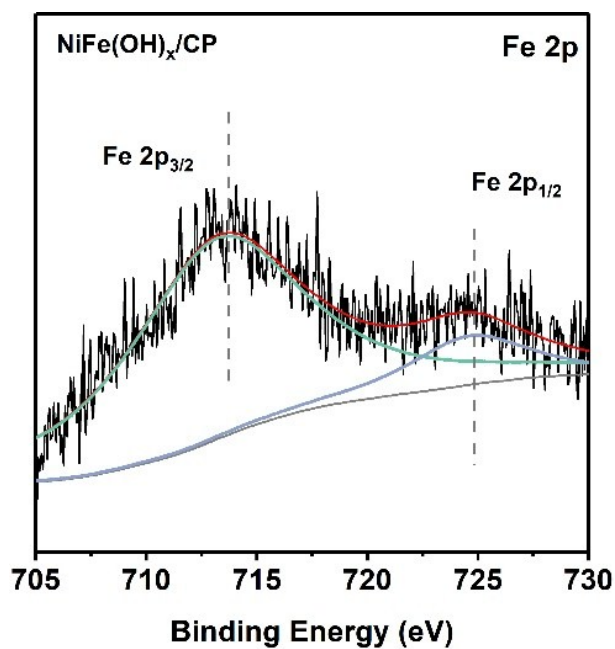

**Fig. S8.** Fe 2p XPS spectrum of the typical NiFe(OH)<sub>x</sub>/CP.

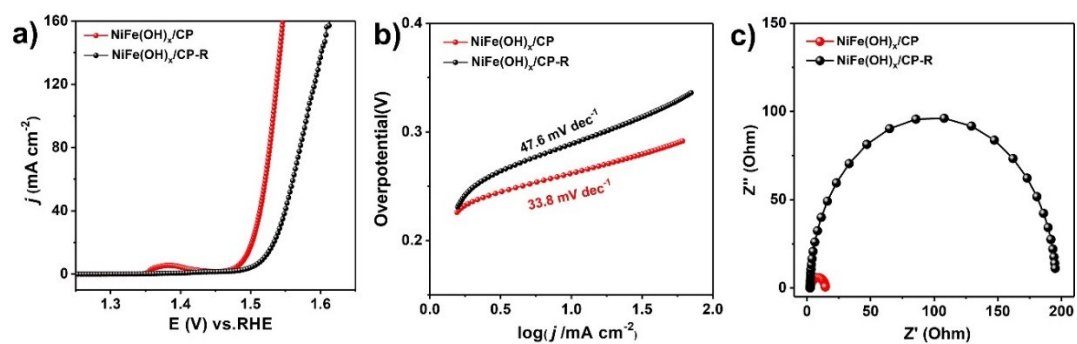

**Fig. S9.** iR-corrected polarization curves (a), corresponding Tafel plots (b), and EIS spectra (c) of the NiFe(OH)<sub>x</sub>/CP and NiFe(OH)<sub>x</sub>/CP-R.

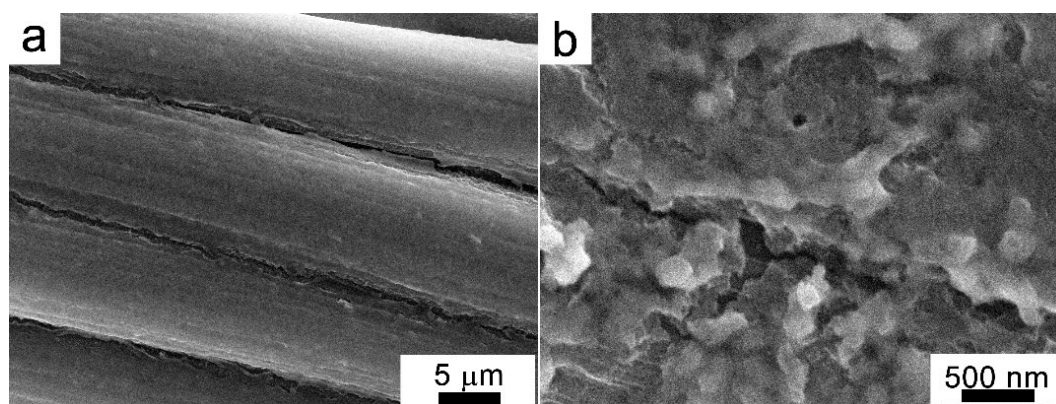

**Fig. S10.** Low- and high-magnification SEM images of the NiFe(OH)<sub>x</sub>/CP after OER operation.

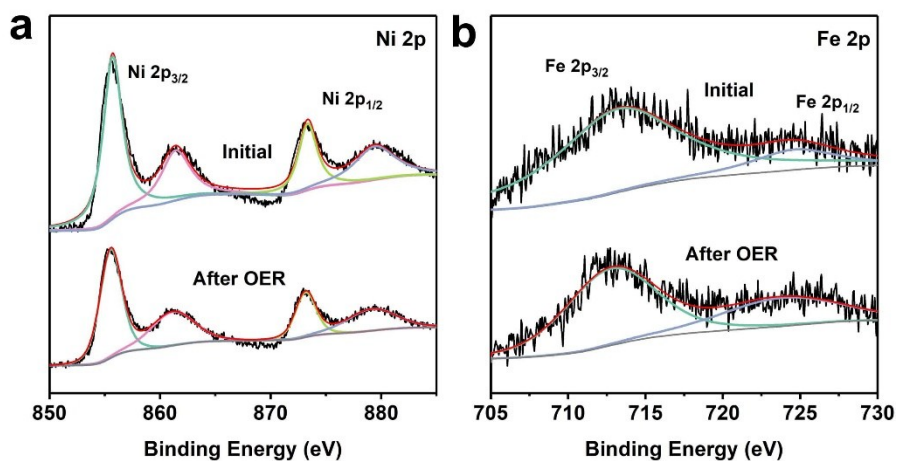

**Fig. S11.** XPS spectra of the NiFe(OH)<sub>x</sub>/CP before and after OER operation: Ni 2p (a) and Fe 2p (b).

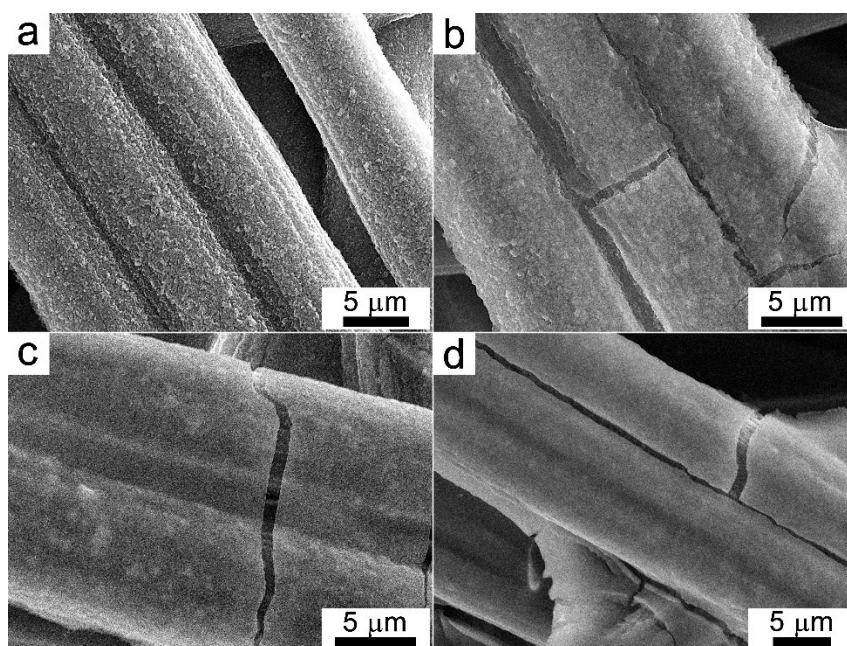

**Fig. S12.** SEM images of Ni(OH)<sub>x</sub>/PB/CP obtained at different electrodeposition time of the Ni(OH)<sub>x</sub> layer in 1 mM Ni(NO<sub>3</sub>)<sub>2</sub> solution: 60 s (a), 600 s (b), 2700 s (c), and 3600 s (d).

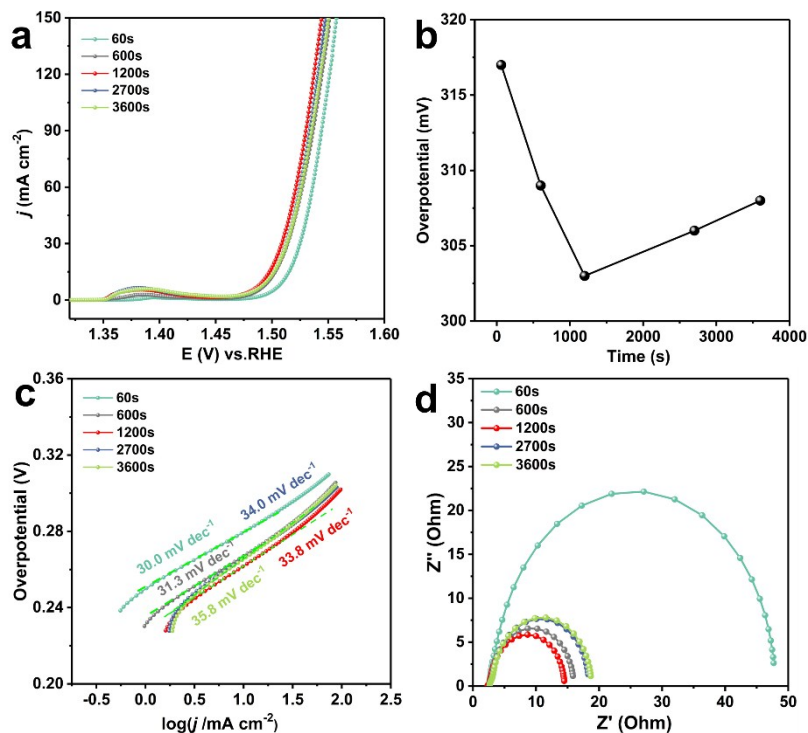

**Fig. S13.** LSV polarization curves (a), corresponding overpotentials at  $100 \text{ mA cm}^{-2}$  (b), Tafel slope plots (c), and EIS spectra (d) of the  $\text{Ni(OH)}_x/\text{PB/CP}$  prepared in  $1 \text{ mM Ni(NO}_3)_2$  solution for different times.

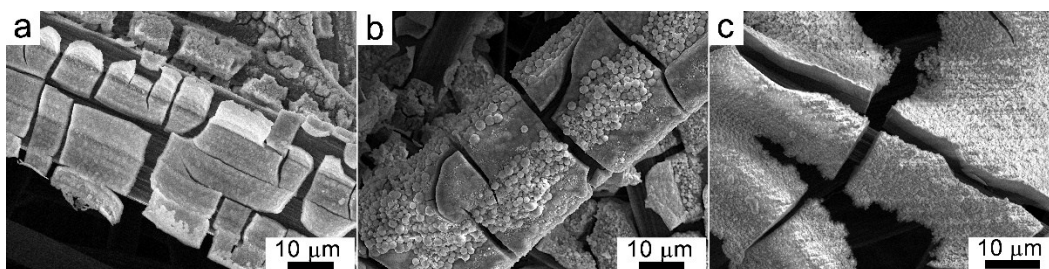

**Fig. S14.** SEM images of  $\text{Ni(OH)}_x/\text{PB/CP}$  prepared in  $\text{Ni(NO}_3)_2$  solutions with different concentrations:  $10 \text{ mM}$  (a),  $20 \text{ mM}$  (b), and  $50 \text{ mM}$  (c).

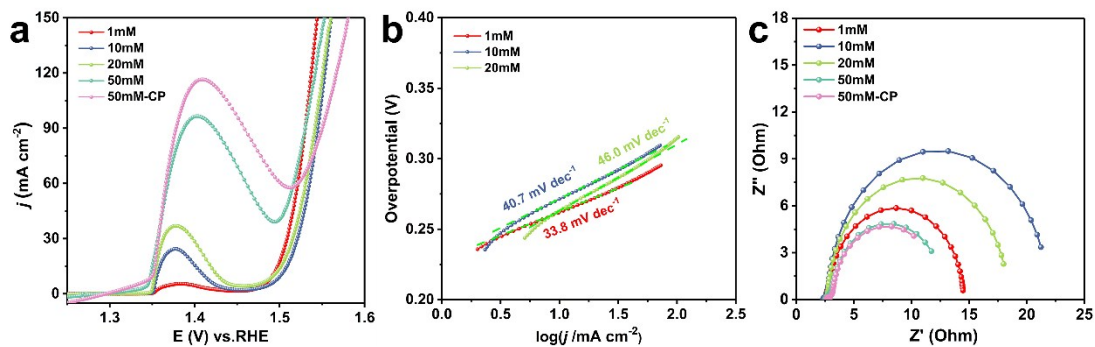

**Fig. S15.** LSV polarization curves (a), Tafel plots (b), and EIS spectra (c) for the  $\text{Ni(OH)}_x/\text{PB/CP}$  prepared in  $\text{Ni(NO}_3)_2$  solutions with different concentrations.

**Table S1.** Concentrations of the electrolyte for electrochemical deposition of PB layer.

| Sample | Fe(NO <sub>3</sub> ) <sub>3</sub><br>[mM] | K <sub>3</sub> [Fe(CN) <sub>6</sub> ]<br>[mM] | KCl<br>[M] | H <sub>2</sub> SO <sub>4</sub><br>[mM] |
|--------|-------------------------------------------|-----------------------------------------------|------------|----------------------------------------|
| a      | 0.5                                       | 0.5                                           | 0.1        | 12.5                                   |
| b      | 0.5                                       | 1                                             | 0.1        | 12.5                                   |
| c      | 1                                         | 0.5                                           | 0.1        | 12.5                                   |
| d      | 2                                         | 0.5                                           | 0.1        | 12.5                                   |

**Table S2.** Summary on the OER performance of earth-abundant OER catalysts in 1.0 M KOH.

| Catalysts <sup>a)</sup>                                                                                    | Loading amount<br>[mg cm <sup>-2</sup> ] | Substrate               | $\eta@10$ m<br>A cm <sup>-2</sup><br>[mV] | $\eta@100$<br>mA cm <sup>-2</sup><br>[mV] | Tafel<br>slope<br>[mV<br>dec <sup>-1</sup> ] | Stability<br>test | Reference        |
|------------------------------------------------------------------------------------------------------------|------------------------------------------|-------------------------|-------------------------------------------|-------------------------------------------|----------------------------------------------|-------------------|------------------|
| <b>Amorphous porous<br/>NiFe(OH)<sub>x</sub> layer</b>                                                     | <b>~ 0.8</b>                             | <b>Carbon<br/>paper</b> | <b>261</b>                                | <b>303</b>                                | <b>33.8</b>                                  | <b>50 h</b>       | <b>This work</b> |
| Oxygen-enriched NiFe-<br>LDH                                                                               | 0.28                                     | Glassy carbon           | 310                                       | –                                         | 74                                           | 9                 | 1                |
| NiFe LDH                                                                                                   | 1.03                                     | Graphdiyne              | 260                                       | –                                         | 95                                           | 6                 | 2                |
| NiFeOOH derived<br>from NiFe PBA                                                                           | 0.25                                     | Glassy carbon           | 258                                       | 304                                       | 46                                           | –                 | 3                |
| Porous NiFe oxide<br>nanocubes derived<br>from NiFe PBA                                                    | 2.2                                      | Carbon fiber<br>paper   | 271                                       | –                                         | 48                                           | 18 h              | 4                |
| NiFe oxyhydroxide<br>derived from CN<br>vacancy-mediated-<br>PBA                                           | 0.255                                    | Glassy carbon           | 283                                       | –                                         | 54                                           | 25 h              | 5                |
| FeNi LDH/Ti <sub>3</sub> C <sub>2</sub><br>MXene                                                           | 0.2                                      | Ni foam                 | 298                                       | –                                         | 43                                           | 12                | 6                |
| Phosphorylated NiFe<br>hydroxide                                                                           | –                                        | Carbon fiber<br>paper   | 290                                       | –                                         | 38                                           | 10 h              | 7                |
| N-doped carbon-coated<br>core-shell<br>NiFeO <sub>x</sub> @NiFe<br>phosphide derived from<br>NiFe PBA/PVP  | 0.2                                      | Glassy carbon           | 285                                       | –                                         | 48                                           | 20 h              | 8                |
| NiFeSe@NiSe O<br>derived from NiFe PBA                                                                     | –                                        | Carbon fiber            | 270                                       | 360                                       | 63.2                                         | 50 h              | 9                |
| Plasma activated Co-<br>PBA                                                                                | 2.0                                      | Ni foam                 | 274                                       | 330                                       | 53                                           | –                 | 10               |
| Ni <sub>3</sub> FeN<br>nanoparticles/Reduced<br>graphene oxide aerogel                                     | 0.5                                      | Ni foam                 | 270                                       | –                                         | 54                                           | 10                | 11               |
| FeNi <sub>3</sub> and NiFe <sub>2</sub> O <sub>4</sub><br>embedded in N-doped<br>carbon-carbon<br>nanotube | 0.5                                      | Glassy carbon           | 274                                       | –                                         | –                                            | 11                | 12               |
| Hybrid Ni-based MOFs<br>nanosheets decorated                                                               | 0.2                                      | Glassy carbon           | 265                                       | –                                         | 82                                           | –                 | 13               |



|                                                                            |   |               |     |   |    |    |    |
|----------------------------------------------------------------------------|---|---------------|-----|---|----|----|----|
| with Fe-MOF nanoparticles                                                  |   |               |     |   |    |    |    |
| MOF-derived hierarchical (Co,Ni)Se <sub>2</sub> @NiFe LDH hollow nanocages | – | Glassy carbon | 277 | – | 75 | 17 | 14 |

<sup>a)</sup> LDH: layered double hydroxide; PBA: Prussian blue analogue; PVP: polyvinylpyrrolidone; MOF: metal–organic framework.

**Table S3.** Molar ratio of Ni/Fe measured by ICP-OES for the Ni(OH)<sub>x</sub>/PB/CP samples obtained at different deposition conditions of Ni(OH)<sub>x</sub> layer.

| Ni(NO <sub>3</sub> ) <sub>2</sub> concentration [mM] | Deposition time [s] | Molar ratio of Ni/Fe |
|------------------------------------------------------|---------------------|----------------------|
| 1                                                    | 60                  | 0.33                 |
| 1                                                    | 600                 | 1.8                  |
| 1                                                    | 1200                | 1.9                  |
| 1                                                    | 2700                | 2.7                  |
| 1                                                    | 3600                | 3.4                  |
| 10                                                   | 1200                | 2.9                  |
| 20                                                   | 1200                | 36.25                |
| 50                                                   | 1200                | 165.6                |

## Reference

- Chen, H.; Zhao, Q.; Gao, L.; Ran, J.; Hou, Y. Water-Plasma Assisted Synthesis of Oxygen-Enriched Ni–Fe Layered Double Hydroxide Nanosheets for Efficient Oxygen Evolution Reaction. *ACS Sustainable Chemistry & Engineering* **2019**, *7*, 4247-4254.
- Shi, G.; Yu, C.; Fan, Z.; Li, J.; Yuan, M. Graphdiyne-Supported NiFe Layered Double Hydroxide Nanosheets as Functional Electrocatalysts for Oxygen Evolution. *ACS Applied Materials & Interfaces* **2019**, *11*, 2662-2669.
- Su, X.; Wang, Y.; Zhou, J.; Gu, S.; Li, J.; Zhang, S. Operando Spectroscopic Identification of Active Sites in NiFe Prussian Blue Analogues as Electrocatalysts: Activation of Oxygen Atoms for Oxygen Evolution Reaction. *Journal of the American Chemical Society* **2018**, *140*, 11286-11292.
- Kumar, A.; Bhattacharyya, S. Porous NiFe-oxide nanocubes as bifunctional electrocatalysts for efficient water-splitting. *ACS Applied Materials & Interfaces* **2017**, *9*, 41906-41915.
- Yu, Z.-Y.; Duan, Y.; Liu, J.-D.; Chen, Y.; Liu, X.-K.; Liu, W.; Ma, T.; Li, Y.; Zheng, X.-S.; Yao, T.; Gao, M.-R.; Zhu, J.-F.; Ye, B.-J.; Yu, S.-H. Unconventional CN vacancies suppress iron-leaching in Prussian blue analogue pre-catalyst for boosted oxygen evolution catalysis. *Nature Communications* **2019**, *10*, 2799.
- Yu, M.; Zhou, S.; Wang, Z.; Zhao, J.; Qiu, J. Boosting electrocatalytic oxygen evolution by synergistically coupling layered double hydroxide with MXene. *Nano Energy* **2018**, *44*, 181-190.

- 7 Li, Y.; Zhao, C. Enhancing Water Oxidation Catalysis on a Synergistic Phosphorylated NiFe Hydroxide by Adjusting Catalyst Wettability. *ACS Catalysis* **2017**, *7*, 2535-2541.
- 8 Hu, Q.; Liu, X.; Tang, C.; Fan, L.; Chai, X.; Zhang, Q.; Liu, J.; He, C. Facile fabrication of a 3D network composed of N-doped carbon-coated core-shell metal oxides/phosphides for highly efficient water splitting. *Sustainable Energy & Fuels* **2018**, *2*, 1085-1092.
- 9 Yilmaz, G.; Tan, C. F.; Lim, Y.-F.; Ho, G. W. Pseudomorphic Transformation of Interpenetrated Prussian Blue Analogs into Defective Nickel Iron Selenides for Enhanced Electrochemical and Photo-Electrochemical Water Splitting. *Advanced Energy Materials* **2019**, *9*, 1802983.
- 10 Guo, Y.; Wang, T.; Chen, J.; Zheng, J.; Li, X.; Ostrikov, K. Air Plasma Activation of Catalytic Sites in a Metal - Cyanide Framework for Efficient Oxygen Evolution Reaction. *Advanced Energy Materials* **2018**, *8*, 1800085.
- 11 Gu, Y.; Chen, S.; Ren, J.; Jia, Y. A.; Chen, C.; Komarneni, S.; Yang, D.; Yao, X. Electronic Structure Tuning in Ni<sub>3</sub>FeN/r-GO Aerogel toward Bifunctional Electrocatalyst for Overall Water Splitting. *ACS Nano* **2018**, *12*, 245-253.
- 12 Zhao, X.; Pachfule, P.; Li, S.; Simke, J. R. J.; Schmidt, J.; Thomas, A. Bifunctional Electrocatalysts for Overall Water Splitting from an Iron/Nickel - Based Bimetallic Metal-Organic Framework/Dicyandiamide Composite. *Angewandte Chemie International Edition* **2018**, *57*, 8921-8926.
- 13 Rui, K.; Zhao, G.; Chen, Y.; Lin, Y.; Zhou, Q.; Chen, J.; Zhu, J.; Sun, W.; Huang, W.; Dou, S. X. Hybrid 2D Dual-Metal-Organic Frameworks for Enhanced Water Oxidation Catalysis. *Advanced Functional Materials* **2018**, *28*, 1801554.
- 14 Li, J.-G.; Sun, H.; Lv, L.; Li, Z.; Ao, X.; Xu, C.; Li, Y.; Wang, C. Metal-Organic Framework-Derived Hierarchical (Co,Ni)Se<sub>2</sub>@NiFe LDH Hollow Nanocages for Enhanced Oxygen Evolution. *ACS Applied Materials & Interfaces* **2019**, *11*, 8106-8114.
